# Supplementary material for: Co- and Ca-phosphate-based catalysts for the depolymerization of organosolv eucalyptus lignin
Source: Royal Society of Chemistry journal article supplement (doi:10.1039/c5ra04286k), 2015-01-01
Supplement: c5ra04286k1.pdf [file c5ra04286k1.pdf]

**1 Supplementary Figure 1**

2 Supplementary Figure 1 XRD data of  $\text{CoP}_2\text{O}_6$

3 Supplementary Figure 2 Production fractionation after lignin depolymerization (adapted from  
4 reference <sup>2</sup>)

5 Supplementary Figure 3 Effect of catalysts on syringol content in aqueous fraction and  
6 residual lignin fraction after depolymerization at 250 °C for 1 h

7 Supplementary Figure 4 FT-IR spectra of residual lignin fractions after depolymerization at  
8 250 °C for 1 h

9 Supplementary Figure 5 Effect of reaction temperature and solvent on syringol content in  
10 fractions with  $\beta\text{-CaP}_2\text{O}_6$  catalyst for 1 h

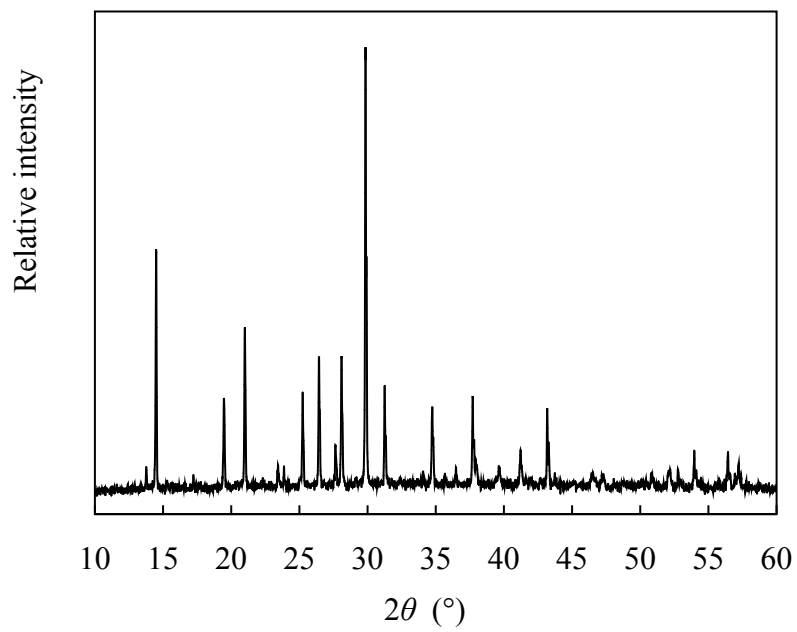

Supplementary Figure 1

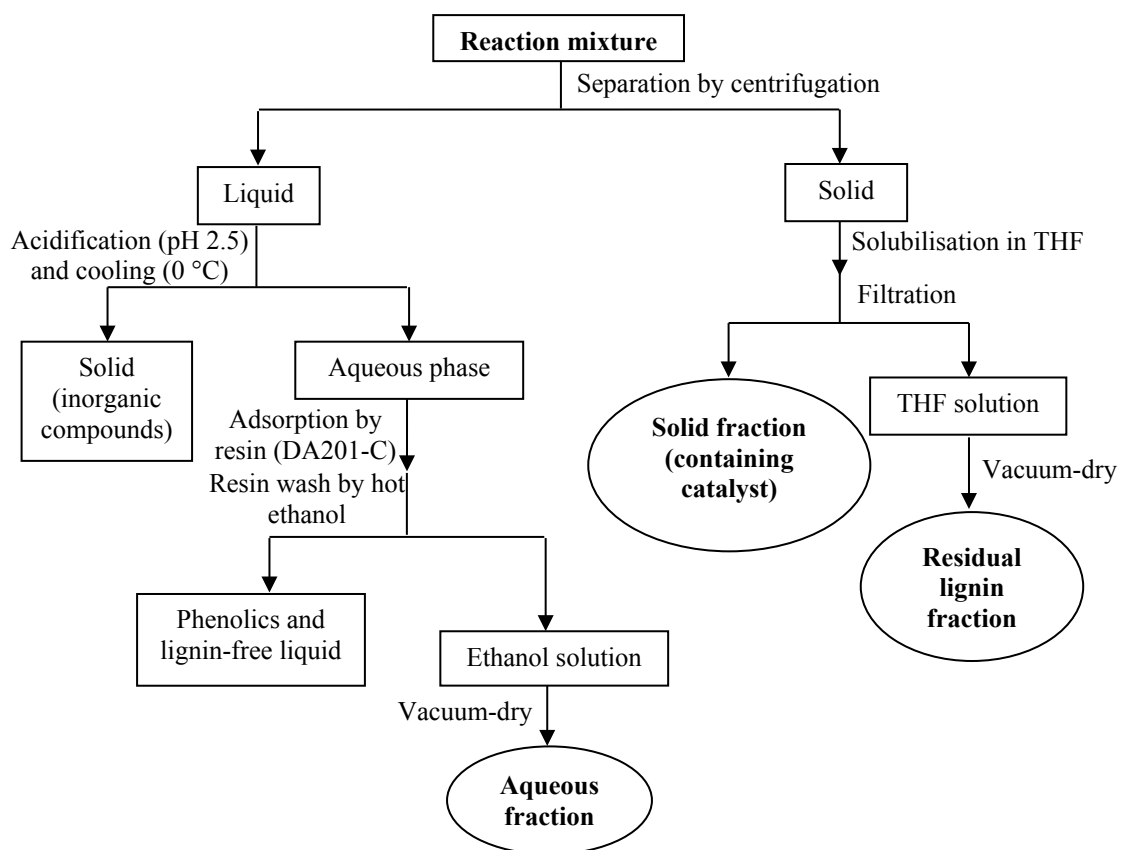

Supplementary Figure 2

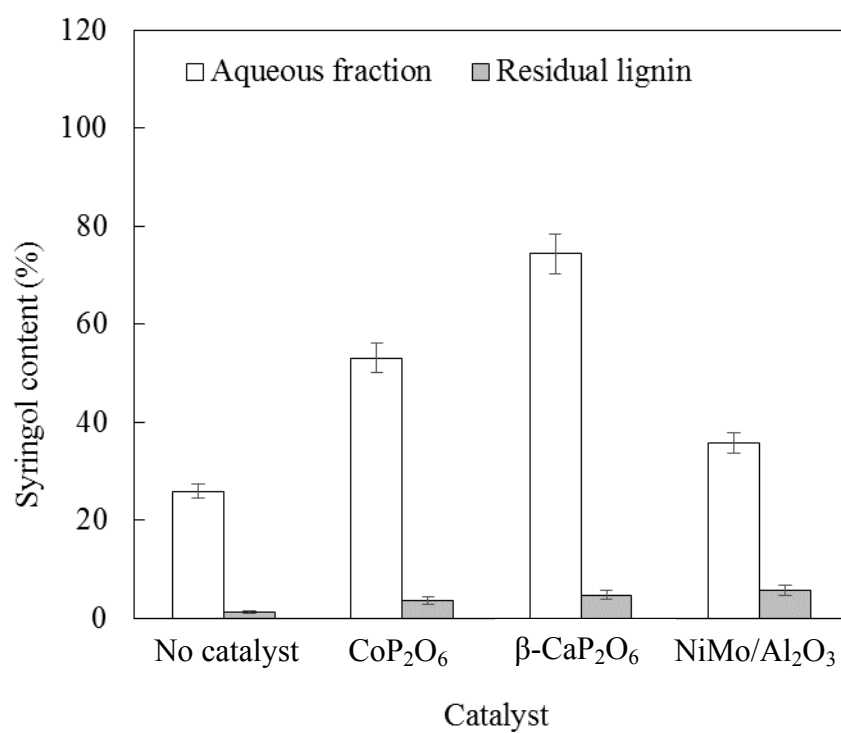

Supplementary Figure 3

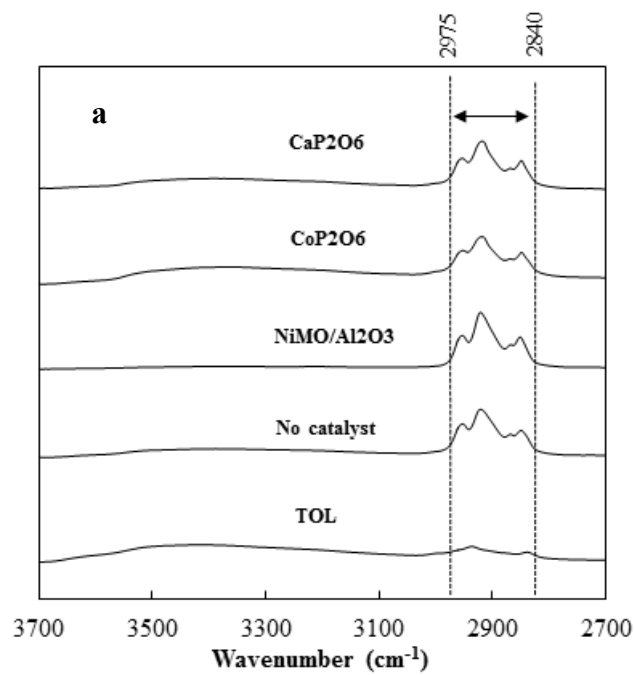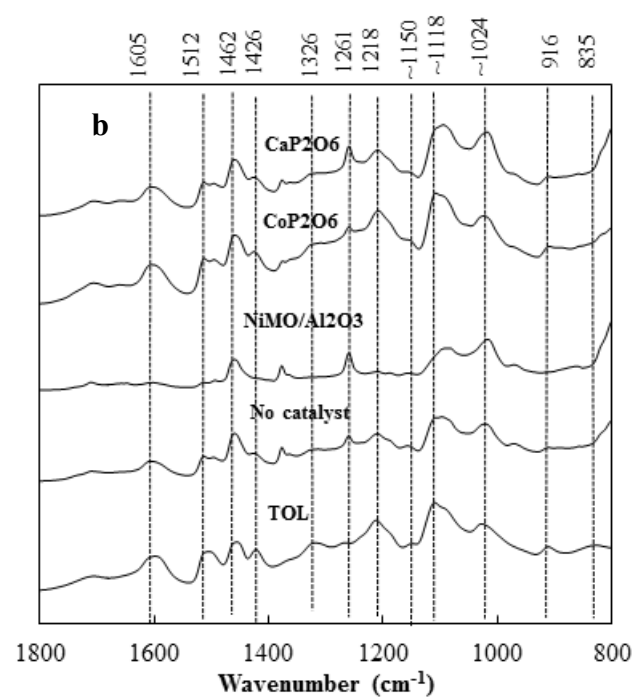

Supplementary Figure 4

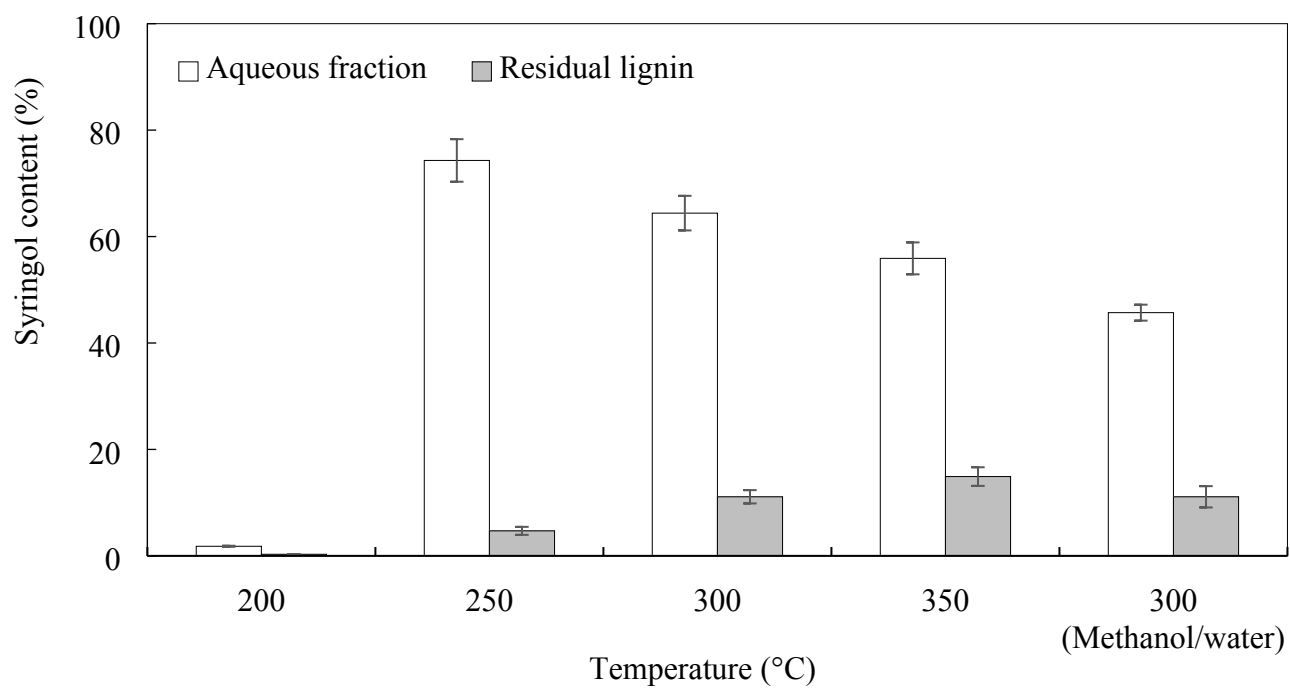

Supplementary Figure 5
